# Supplementary material for: Application of Accelerated Predictive Stability Studies in Extemporaneously Compounded Formulations of Chlorhexidine to Assess the Shelf Life
Source: MDPI journal article supplement (doi:10.3390/molecules28237925), 2023-12-04
Supplement: s1 [file s1]

## Supporting information

### Application of Accelerated Predictive Stability Studies (APS) in extemporaneous compounding formulations of chlorhexidine to assess the shelf-life

**Table S1:** Long-term assays of DCHX content (%).

| Temperature<br>(° C) | Time<br>(days) | Predicted<br>content (%) | Experimental<br>content(%)<br>in clear glass | Experimental<br>content (%)<br>in clear<br>plastic | Experimental<br>content (%)<br>in amber<br>glass | Experimental<br>content (%)<br>in amber<br>plastic |
|----------------------|----------------|--------------------------|----------------------------------------------|----------------------------------------------------|--------------------------------------------------|----------------------------------------------------|
| 5                    | 30             | 99.74                    | 99.79                                        | 99.72                                              | 99.74                                            | 99.66                                              |
|                      | 60             | 99.48                    | 99.38                                        | 99.19                                              | 99.3                                             | 99.19                                              |
|                      | 180            | 98.45                    | 98.47                                        | 98.32                                              | 98.4                                             | 98.38                                              |
|                      | 360            | 96.9                     | 96.78                                        | 96.5                                               | 96.8                                             | 97.2                                               |
| 25                   | 30             | 98.55                    | 99.67                                        | 99.59                                              | 99.52                                            | 99.48                                              |
|                      | 60             | 97.1                     | 99.09                                        | 99.07                                              | 98.91                                            | 99.01                                              |
|                      | 180            | 91.29                    | 95.46                                        | 93                                                 | 93.91                                            | 92.4                                               |
|                      | 360            | 82.58                    | 90.5                                         | 84.2                                               | 91.4                                             | 83.12                                              |
| 30                   | 30             | 97.84                    | 99.26                                        | 98.67                                              | 98.79                                            | 98.77                                              |
|                      | 60             | 95.69                    | 99.08                                        | 98.76                                              | 98.96                                            | 98.55                                              |
|                      | 180            | 87.06                    | 91.01                                        | 83.55                                              | 90.04                                            | 84.62                                              |
|                      | 360            | 74.12                    | 80.6                                         | 71.6                                               | 78.7                                             | 79.21                                              |

## Validation of chromatographic method

Different columns were analyzed to determine which one was the most suitable according to the number of plates and peak resolution (Table S2) at 8.77 min and 4.97 of retention time DCHX and PCA respectively. The BDS Hypersil C18-RP column (250 x 4.6 mm, 5  $\mu$ m) showed the least interferences at 25° C with PCA degradants and exhibited an overall better resolution for both active ingredients 87.96 (DCHX) and 104.69 (PCA).

**Table S2:** RP-C18 column dimensions and calculated parameters.

| Type of Column                                                                | Column dimensions |                        |                          | Column parameters |            |                           |                |
|-------------------------------------------------------------------------------|-------------------|------------------------|--------------------------|-------------------|------------|---------------------------|----------------|
|                                                                               | Length (mm)       | Internal diameter (mm) | Particle size ( $\mu$ m) | API               | Resolution | Number of plates (plates) | Pressure (MPa) |
| <b>Acclaim 300 C18</b><br>(Dionex-Thermo Fisher Scientific, California, EEUU) | 150               | 4.6                    | 3                        | <b>DCHX</b>       | 57.56      | 359,553.211               | 24             |
|                                                                               |                   |                        |                          | <b>PCA</b>        | 31.11      | 302,789.68                |                |
| <b>Nova-pak C18</b><br>(Waters Corporation, Massachusetts, EEUU)              | 300               | 3.9                    | 4                        | <b>DCHX</b>       | 38.98      | 177,903.10                | 28.1           |
|                                                                               |                   |                        |                          | <b>PCA</b>        | 60.1       | 543,103.78                |                |
| <b>BDS Hypersil C18</b><br>(Hypersil-Keystone, Nueva Orleans, EEUU)           | 200               | 4.6                    | 5                        | <b>DCHX</b>       | 93.06      | 408,315.93                | 12             |
|                                                                               |                   |                        |                          | <b>PCA</b>        | 64.46      | 663,214.63                |                |
| <b>BDS Hypersil C18</b><br>(Hypersil-Keystone, Nueva Orleans, EEUU)           | 250               | 4.6                    | 5                        | <b>DCHX</b>       | 87.96      | 646,521.15                | 12.7           |
|                                                                               |                   |                        |                          | <b>PCA</b>        | 104.69     | 1,201,957.67              |                |

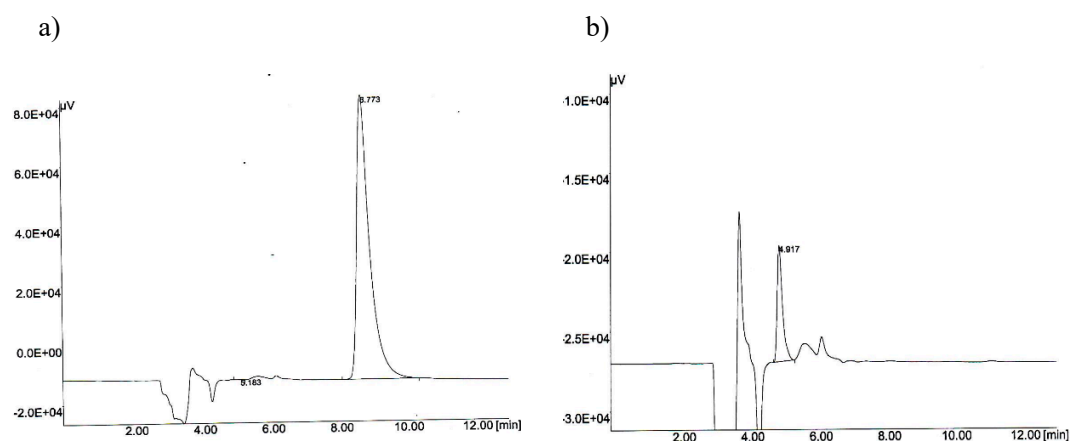

**Figure S1:** Chromatogram of DCHX pattern (a) and PCA pattern (b) with BDS Hypersil C18 250 mm column.
